# Supplementary material for: The Regulatory Network of Natural Competence and Transformation of Vibrio cholerae
Source: PubMed Central journal article supplement (PMC3380833; doi:10.1371/journal.pgen.1002778), 2012-06-21
Supplement: pgen.1002778.s002.pdf [file pgen.1002778.s002.pdf]

**A****+ GlcNAc**[-]-*gfp*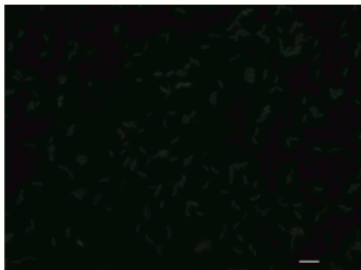[-]-*dsRed*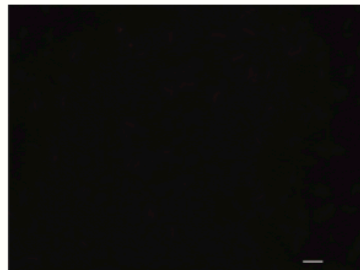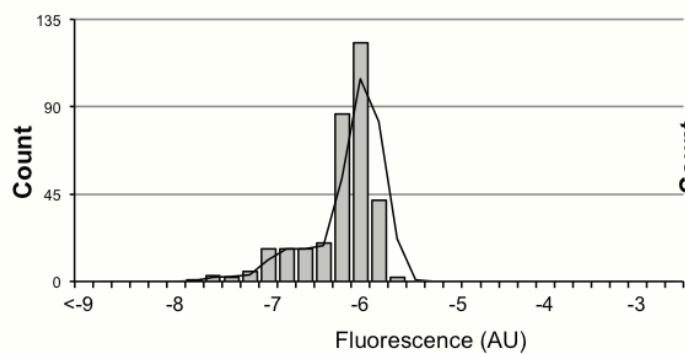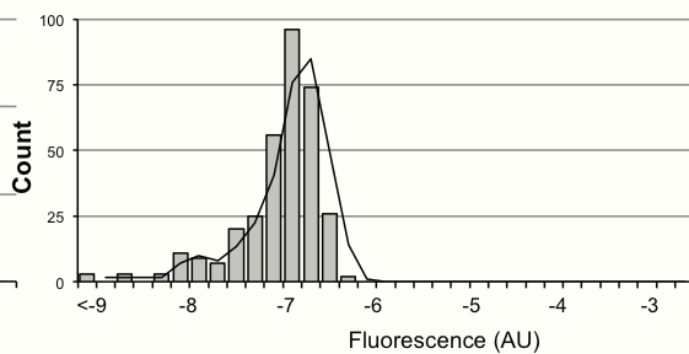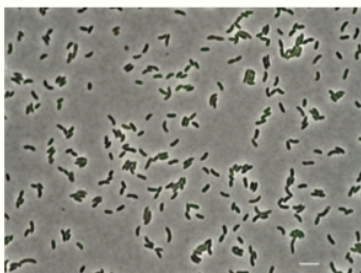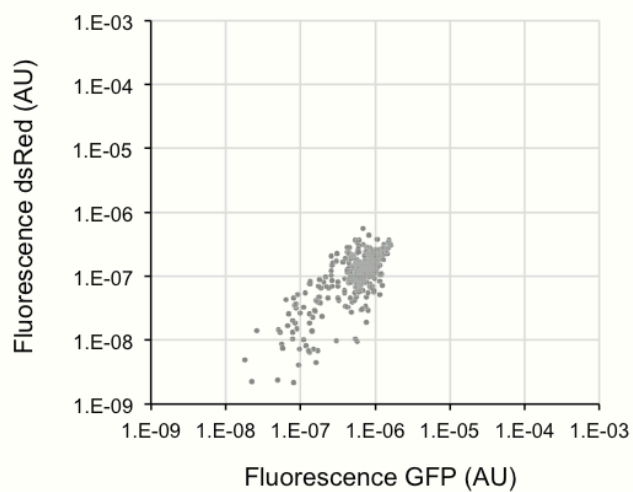**Fig. S2A**

**B****+ (GlcNAc)<sub>6</sub>**[-]-*gfp*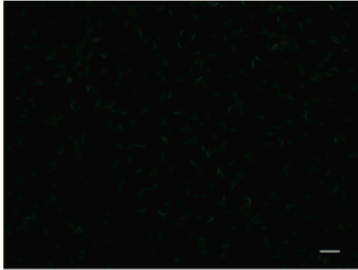[-]-*dsRed*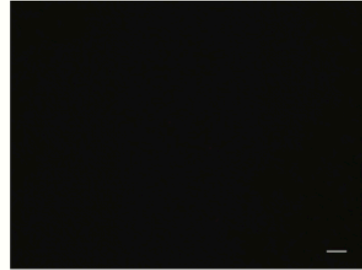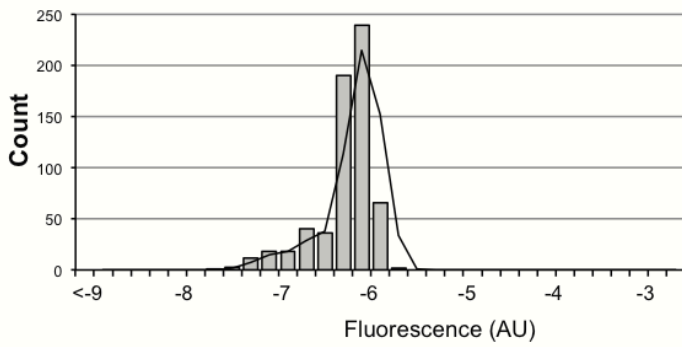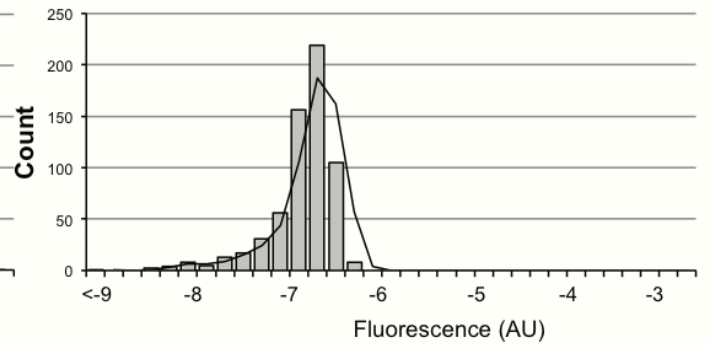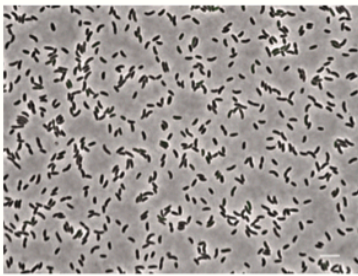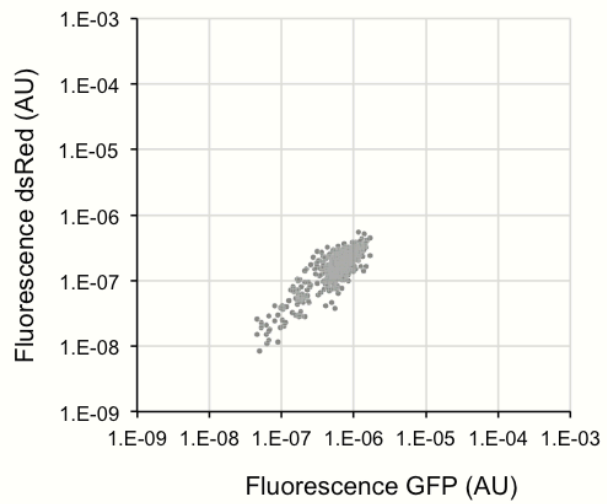**Fig. S2B**

**C****+ GlcNAc** $[P_{pilA}]$ -*gfp*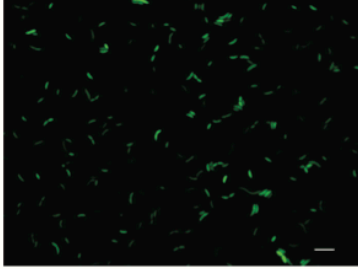 $[P_{comEA}]$ -*dsRed*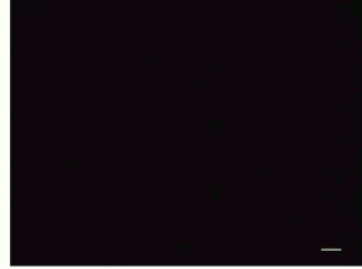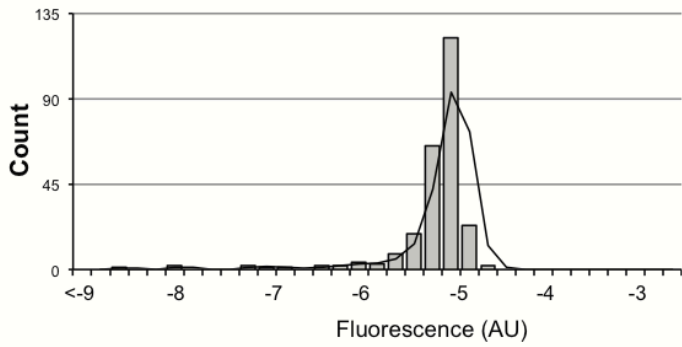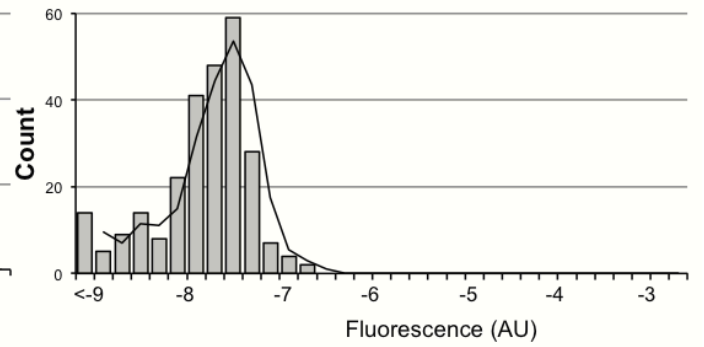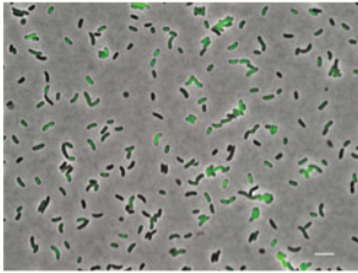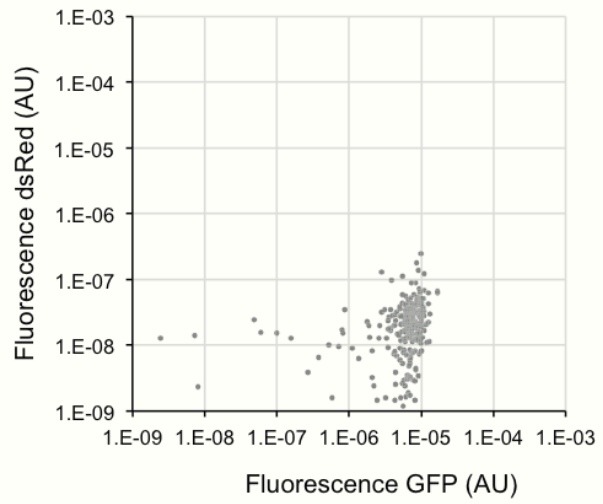**Fig. S2C**

**D****+ (GlcNAc)<sub>6</sub>****[P<sub>*pilA*</sub>]-*gfp***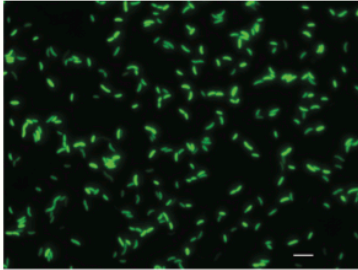**[P<sub>*comEA*</sub>]-*dsRed***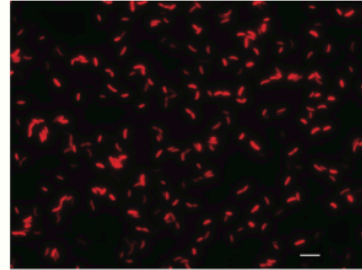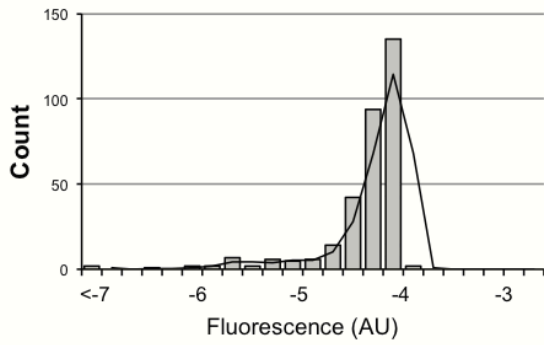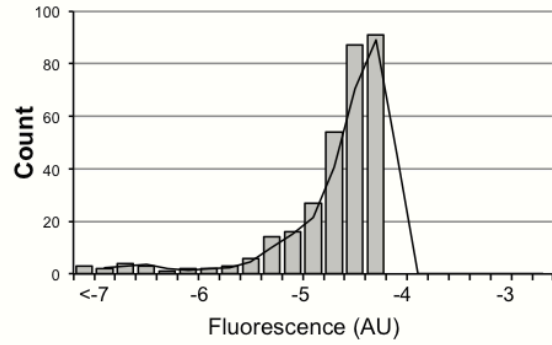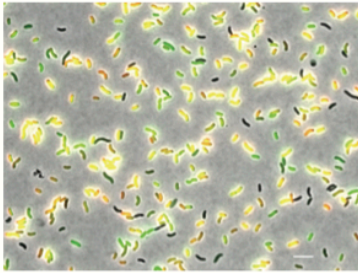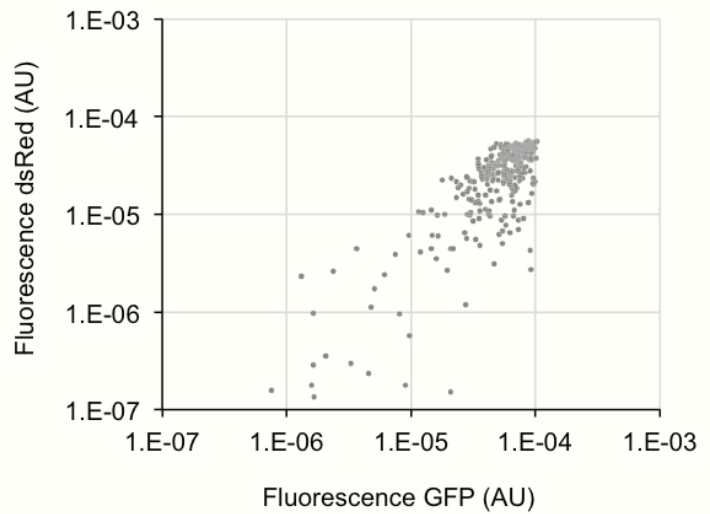**Fig. S2D**

**E****+ GlcNAc** $[P_{comEA}]$ -*gfp*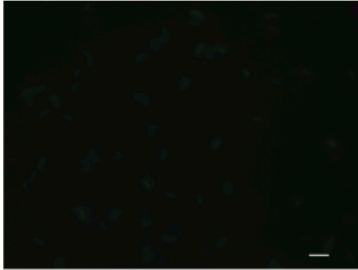 $[P_{pilA}]$ -*dsRed*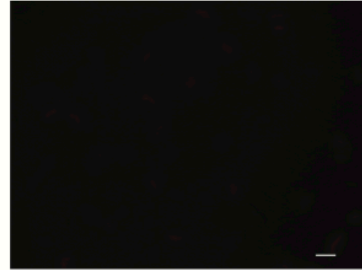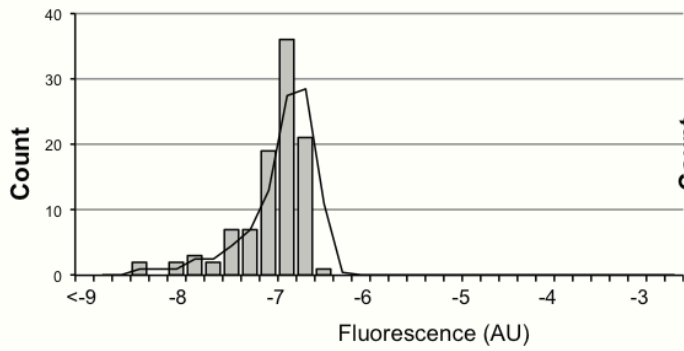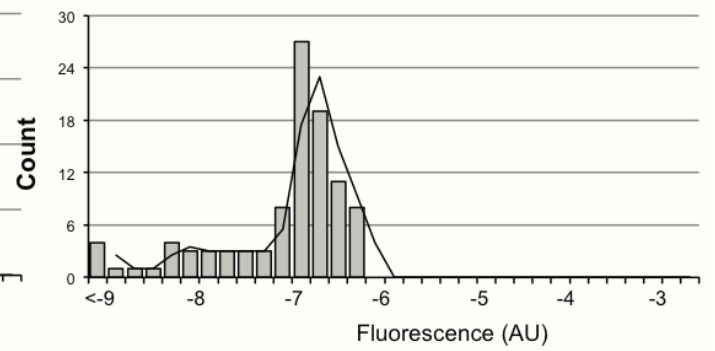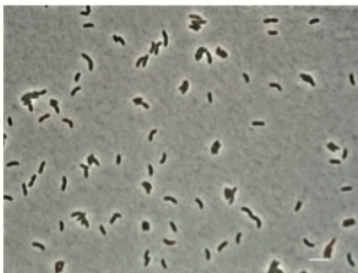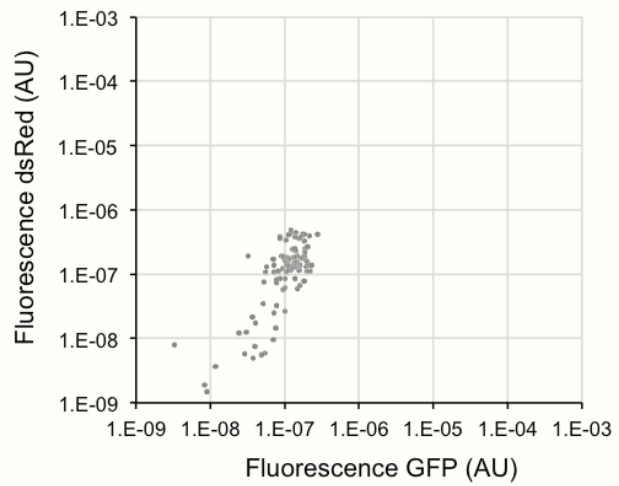**Fig. S2E**

**F****+ (GlcNAc)<sub>6</sub>****[P<sub>comEA</sub>]-gfp**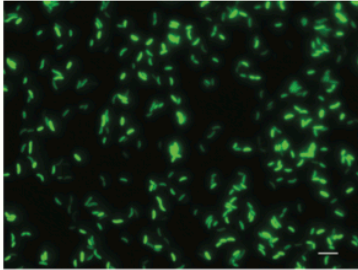**[P<sub>pilA</sub>]-dsRed**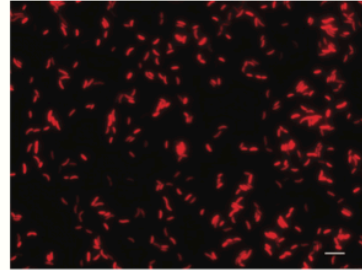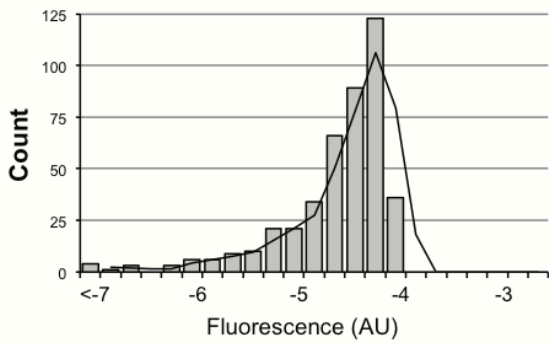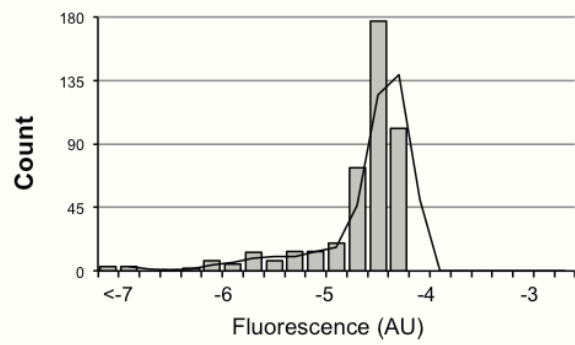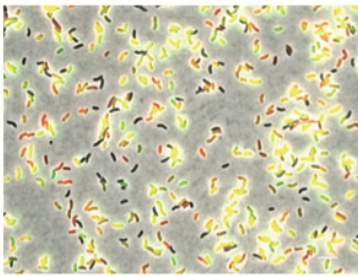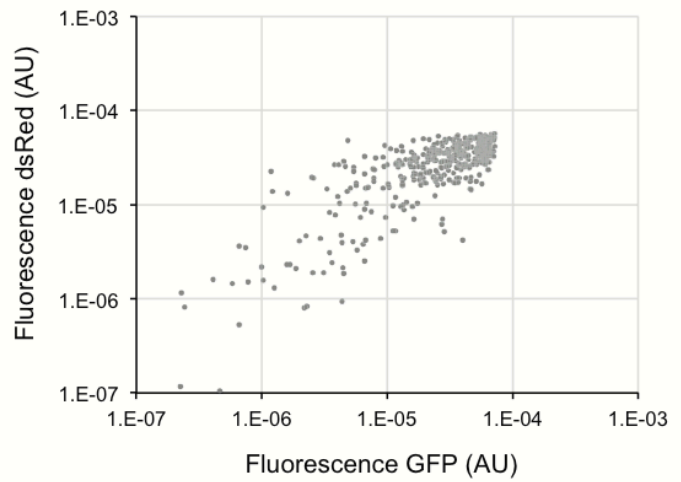**Fig. S2F**

**G****+ GlcNAc** $[P_{gyrA}]$ -*gfp*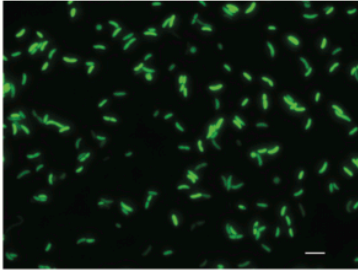 $[P_{comEA}]$ -*dsRed*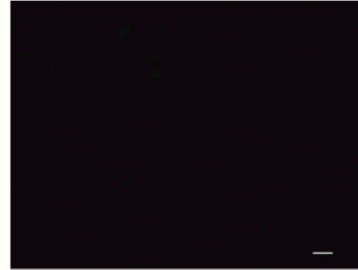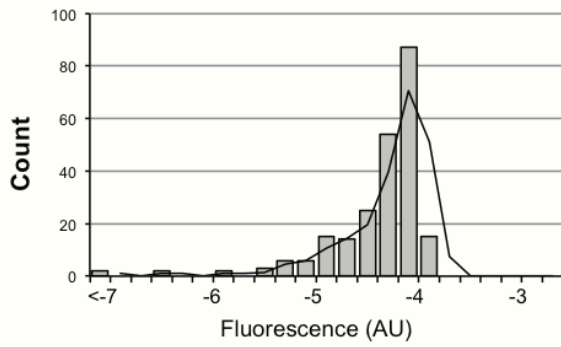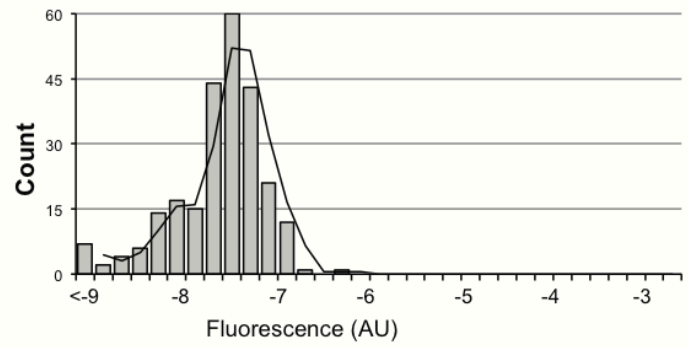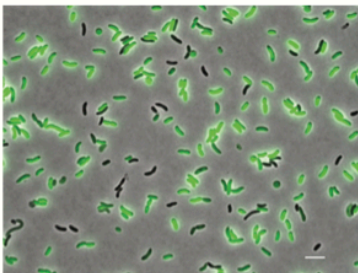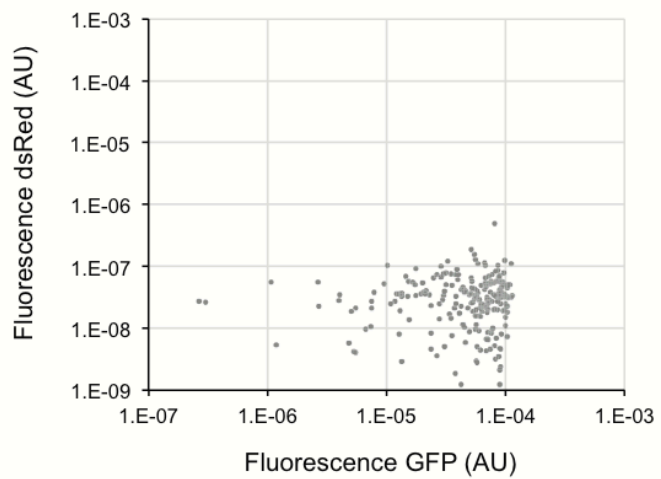**Fig. S2G**

**H****+ (GlcNAc)<sub>6</sub>****[P<sub>gyrA</sub>]-*gfp***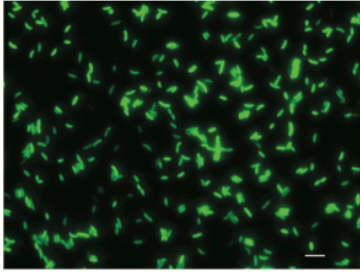**[P<sub>comEA</sub>]-*dsRed***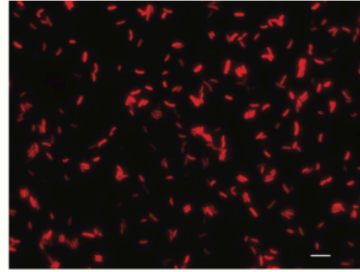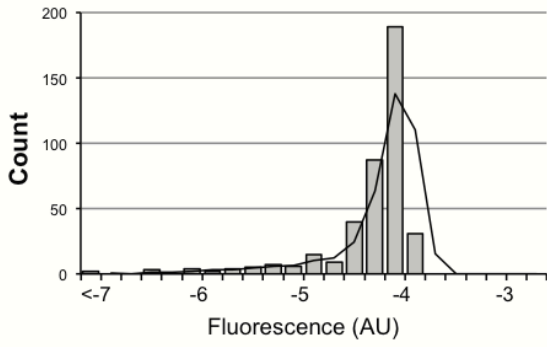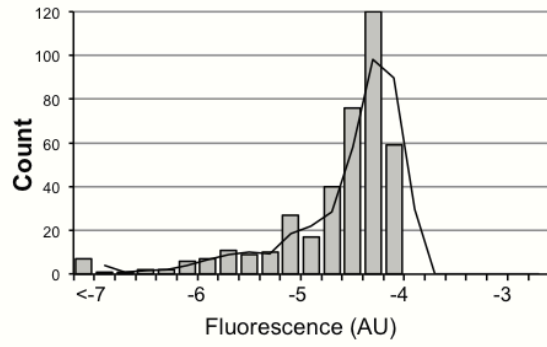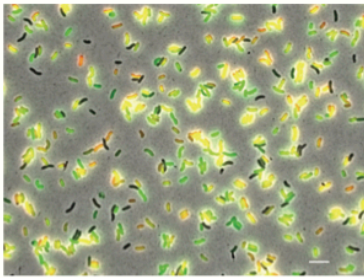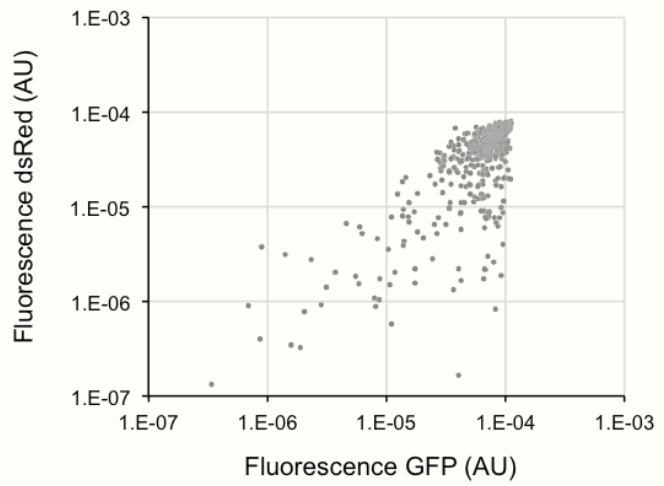**Fig. S2H**
