# Supplementary material for: The Regulatory Network of Natural Competence and Transformation of Vibrio cholerae
Source: PubMed Central journal article supplement (PMC3380833; doi:10.1371/journal.pgen.1002778), 2012-06-21
Supplement: pgen.1002778.s003.pdf [file pgen.1002778.s003.pdf]

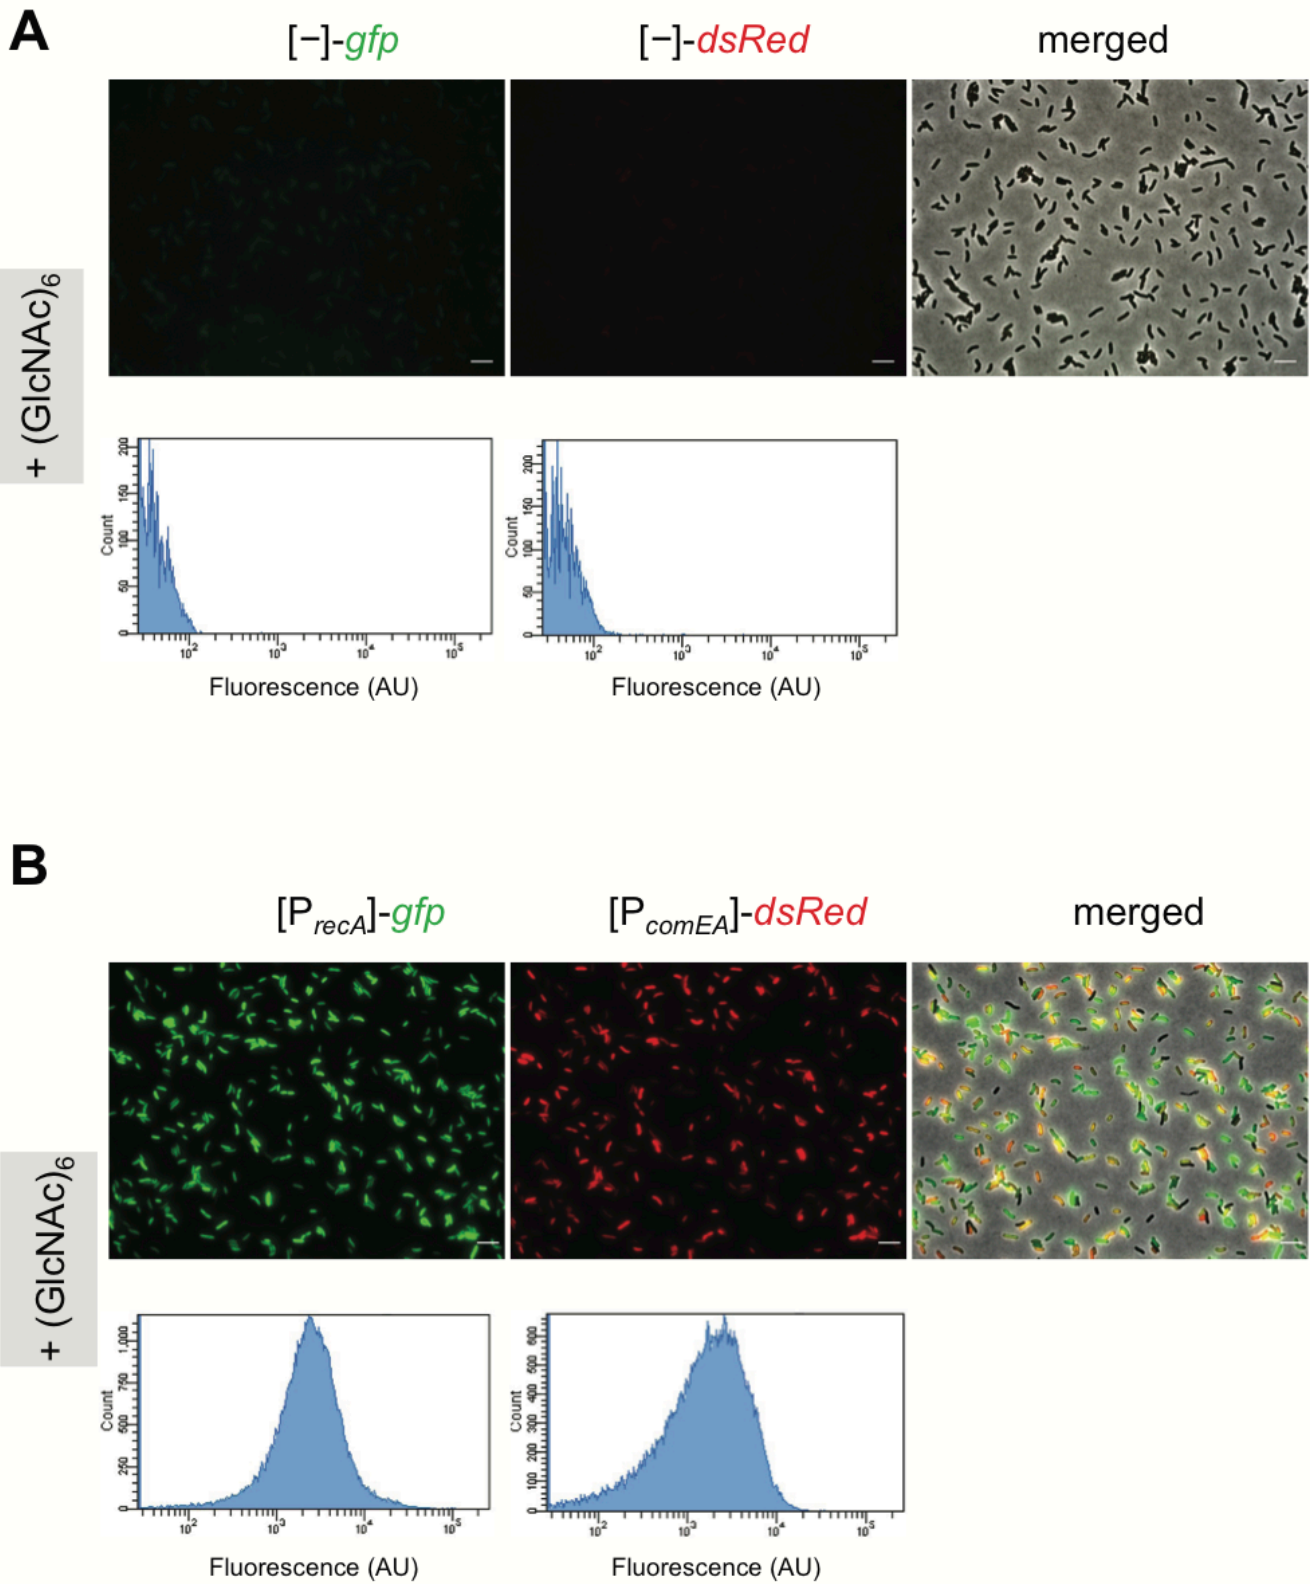

Fig. S3A/B

**C** $[P_{clpX}]$ -*gfp* $[P_{comEA}]$ -*dsRed*

merged

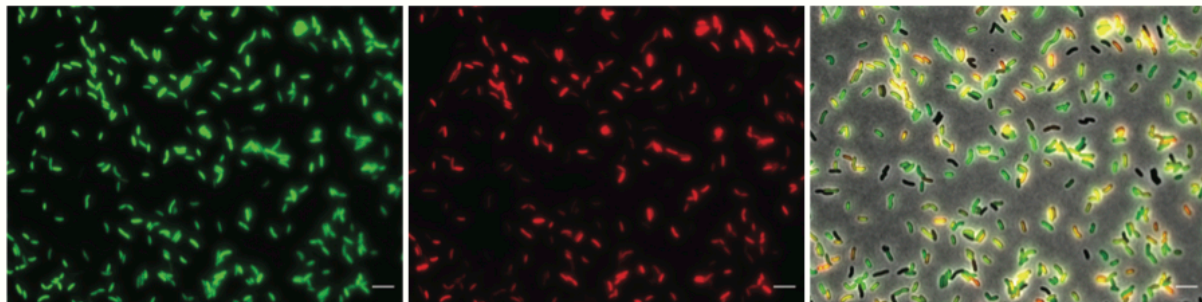+ (GlcNAc)<sub>6</sub>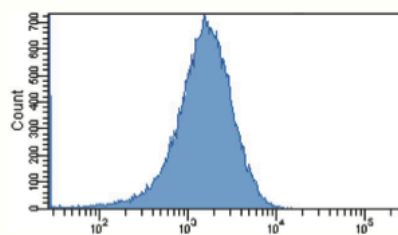

Fluorescence (AU)

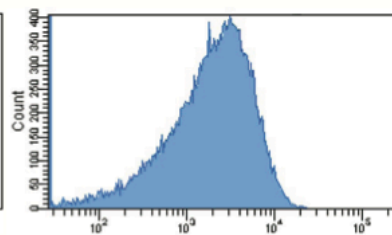

Fluorescence (AU)

**D** $[P_{ftsH}]$ -*gfp* $[P_{comEA}]$ -*dsRed*

merged

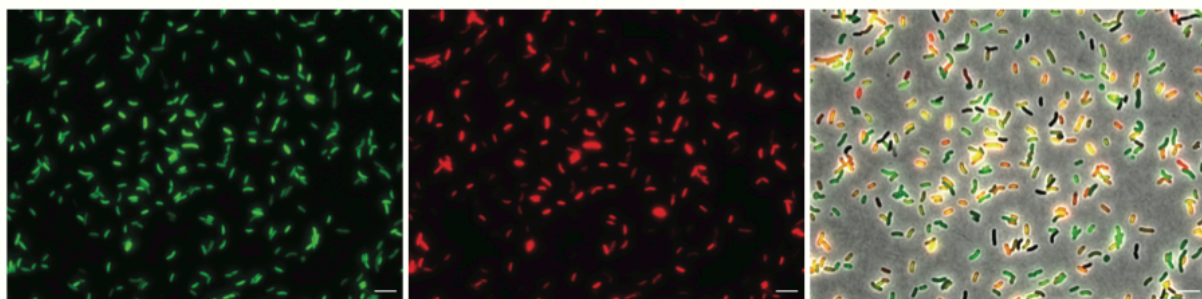+ (GlcNAc)<sub>6</sub>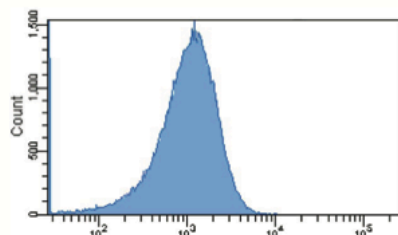

Fluorescence (AU)

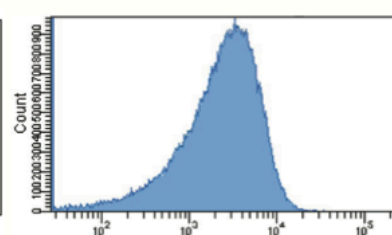

Fluorescence (AU)

**Fig. S3C/D**
